# Supplementary material for: Simultaneously increased discharged energy density and efficiency in bilayer-structured nanocomposites with AgNbO3 lead-free antiferroelectric nanofillers
Source: Royal Society of Chemistry journal article supplement (doi:10.1039/d2ta05601a), 2022-01-01
Supplement: d2ta05601a1.pdf [file d2ta05601a1.pdf]

## Supporting Information

### **Simultaneously Increased Discharged Energy Density and Efficiency in Bilayer-Structured Nanocomposites with AgNbO<sub>3</sub> Lead-Free Antiferroelectric Nanofillers**

Ying Jiang <sup>a</sup>, Zhangmeng Luo <sup>a</sup>, Yue Huang <sup>b</sup>, Meng Shen <sup>b</sup>, Haitao Huang <sup>c</sup>, Shenglin Jiang <sup>d</sup>, Yunbin He <sup>a,\*</sup>, Qingfeng Zhang <sup>a,\*</sup>

<sup>a</sup>*Hubei Key Lab of Ferro & Piezoelectric Materials and Devices, School of Materials Science & Engineering, Hubei University, Wuhan 430062, China*

<sup>b</sup>*School of Physics and Electronic Science, Hubei University, Wuhan 430062, China*

<sup>c</sup>*Department of Applied Physics, The Hong Kong Polytechnic University, Hong Kong, China*

<sup>d</sup>*School of Optical and Electronic Information and Wuhan National Laboratory for Optoelectronics, Huazhong University of Science and Technology, Wuhan, 430074, China*

\*Corresponding authors.

E-mail addresses: ybhe@hubu.edu.cn (Y. He), zhangqingfeng@hubu.edu.cn (Q. Zhang)

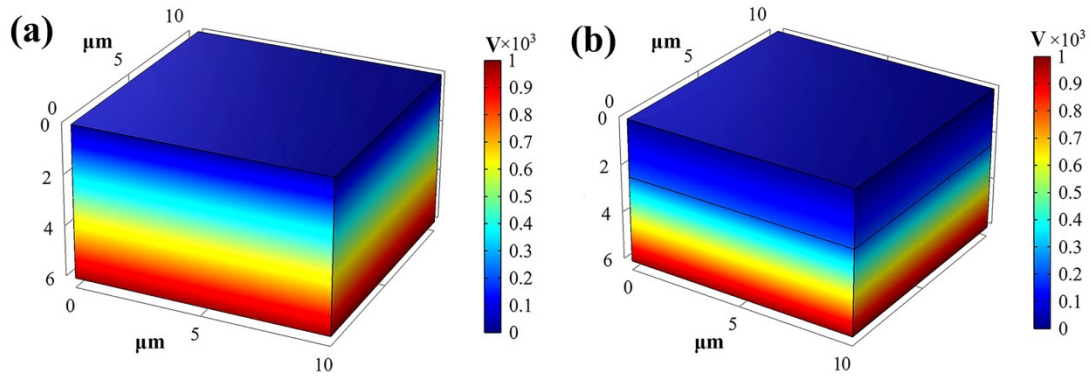

**Fig. S1.** Electric potential distributions of (a) AN/P(VDF-HFP) and (b) PI-AN/P(VDF-HFP) nanocomposites.

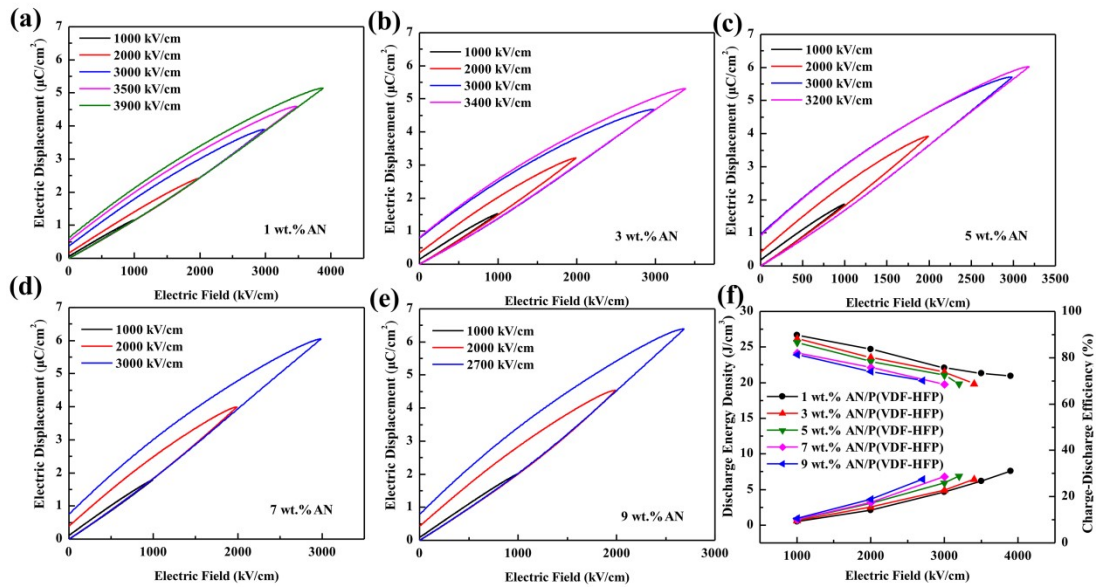

**Fig. S2.** *D-E* loops of AN/P(VDF-HFP) nanocomposites containing (a) 1 wt.%, (b) 3 wt.%, (c) 5 wt.%, (d) 7 wt.%, (e) 9 wt.% AN NP content at different electric fields and (f) discharged energy density and charge-discharge efficiency of AN/P(VDF-HFP) nanocomposites.

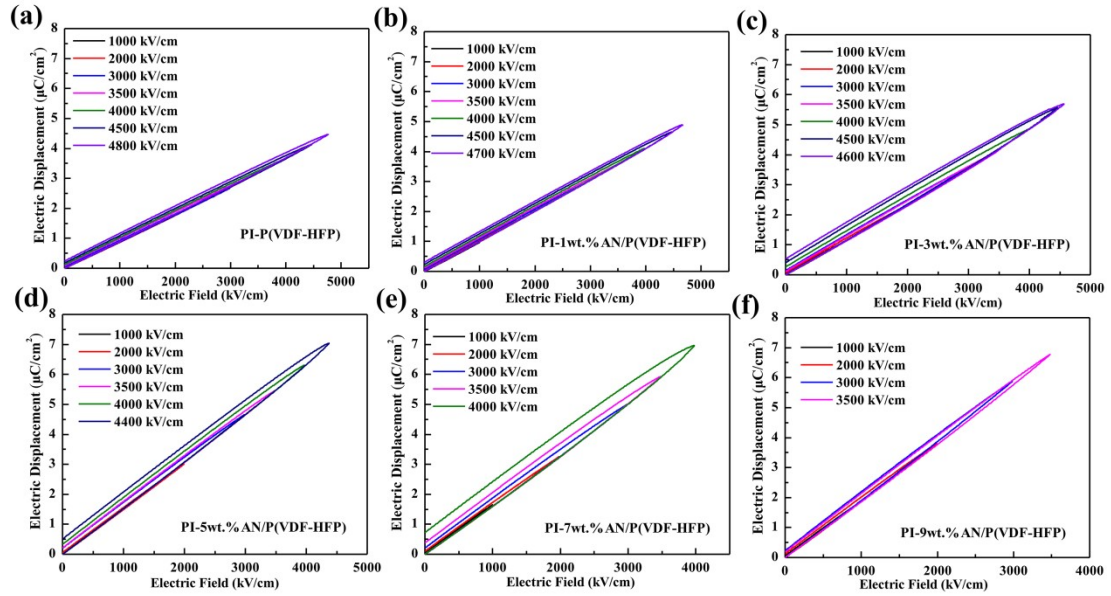

**Fig. S3.** *D-E* loops of PI-AN/P(VDF-HFP) bilayer nanocomposites containing (a) 0 wt.%, (b) 1 wt.%, (c) 3 wt.%, (d) 5 wt.%, (e) 7 wt.% and (f) 9 wt.% AN NP content at different electric fields.
